# Supplementary material for: Graphene quantum dots-decorated ZnS nanobelts with highly efficient photocatalytic performances
Source: Royal Society of Chemistry journal article supplement (doi:10.1039/c5ra28026e), 2016-01-01
Supplement: c5ra28026e1.pdf [file c5ra28026e1.pdf]

## Supporting Information

### Graphene quantum dots-decorated ZnS nanobelts with highly efficient photocatalytic performances

Sooho Ham, Yeonho Kim, Myung jin Park, Byung Hee Hong and Du-Jeon Jang\*

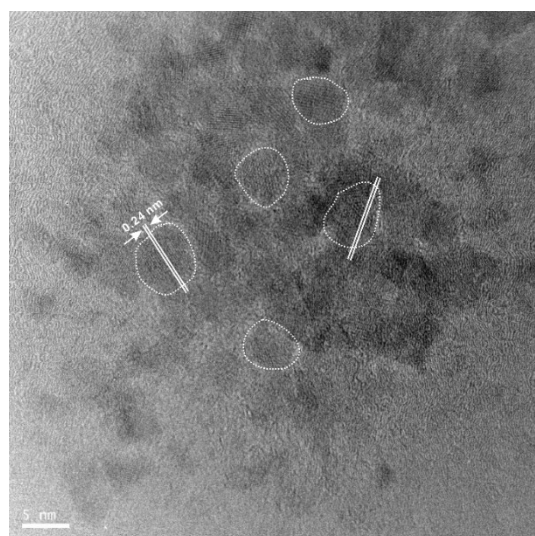

**Fig. S1** HRTEM image of pristine GQDs.

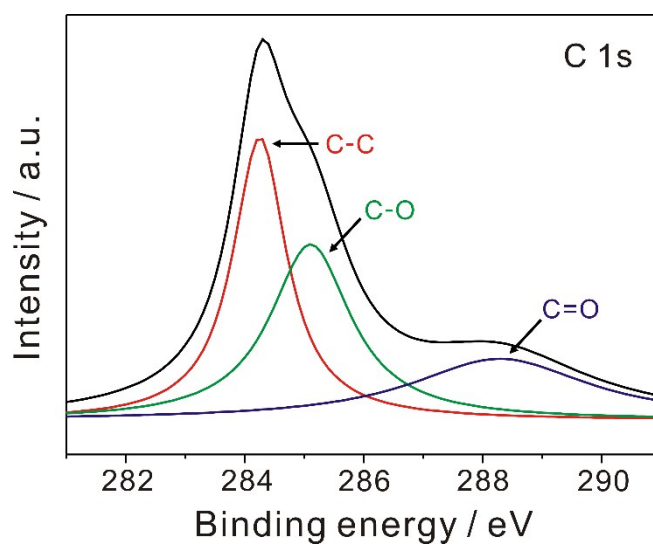

**Fig. S2** C 1s XPS spectrum of pristine GQDs.

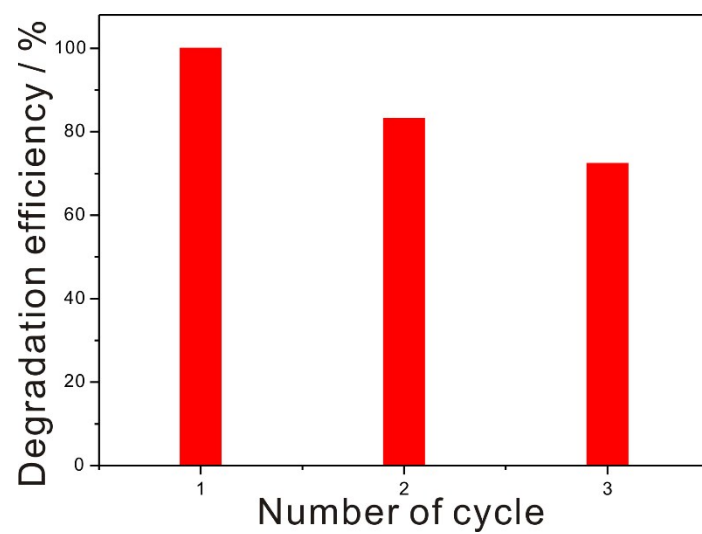

**Fig. S3** Stability test of 0.8 G/ZnS nanocomposites via repeated photocatalytic RhB-degradation experiments.

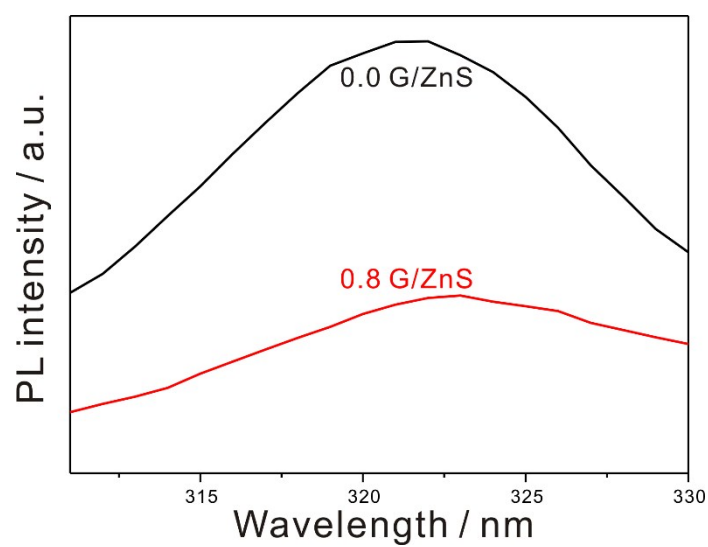

**Fig. S4** Photoluminescence spectra of 0.0 G/ZnS and 0.8 G/ZnS dispersed in ethanol. Samples were excited at 280 nm.
